# Supplementary material
Source: PubMed Central journal article supplement (PMC2375479)
Supplement: tjp0585-0339-SD1.pdf [file tjp0585-0339-SD1.pdf]

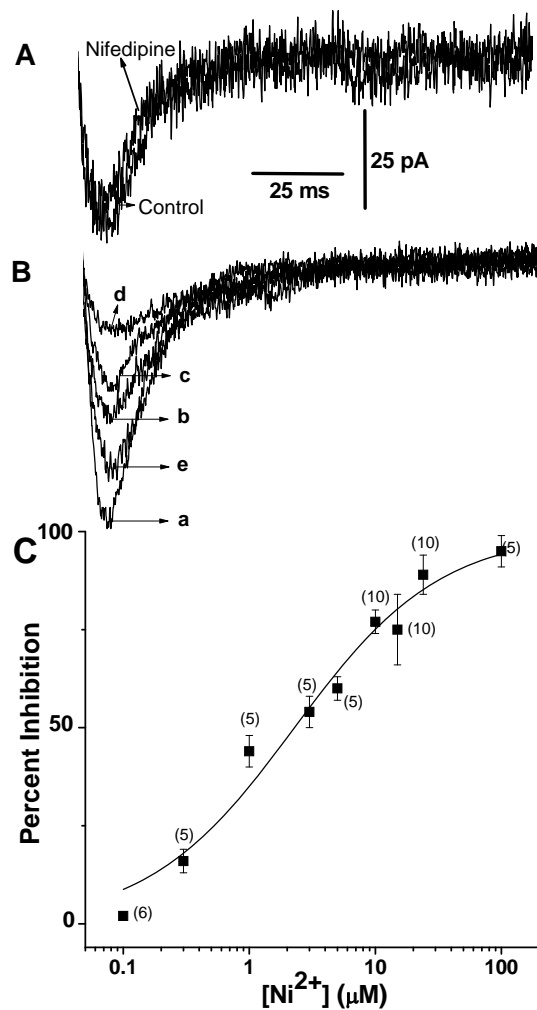

Figure 1 Supplemental - Block properties of T-type calcium currents. **A** Nifedipine (1 μM) does not block the currents evoked by a depolarizing pulse to -20 mV, from a holding of -80 mV. **B** T-type calcium currents require high concentrations of Cd<sup>2+</sup> for efficient blocking. Current responses measured as above. Labels on each trace indicate: a - control; b - 50 μM Cd<sup>2+</sup>; c - 70 μM Cd<sup>2+</sup>; d - 100 μM Cd<sup>2+</sup> and e - wash out. In both **A** and **B** the capacitance transients were digitally deleted from the traces. **C** Concentration-response relationship for the blocking effect of Ni<sup>2+</sup>. Each point represents the percent inhibition of peak current in response to a -20 mV pulse from a holding potential of -80 mV measured in the presence of several Ni<sup>2+</sup> concentrations in the external solution. Percent inhibition is expressed as  $[(I_c - I_{Ni})/I_{Ni}] \times 100$ , where  $I_c$  is the current in control solution and  $I_{Ni}$  in the presence of Ni<sup>2+</sup>. Points are mean  $\pm$  se. Numbers in parentheses indicate the number of cells analyzed in each situation. The solid line represents the best fit of the Hill equation to the experimental points ( $n=0.79$  and  $K_i=2.6 \mu\text{M}$ ).
