# Supplementary material
Source: PubMed Central journal article supplement (PMC2375479)
Supplement: tjp0585-0339-SD2.pdf [file tjp0585-0339-SD2.pdf]

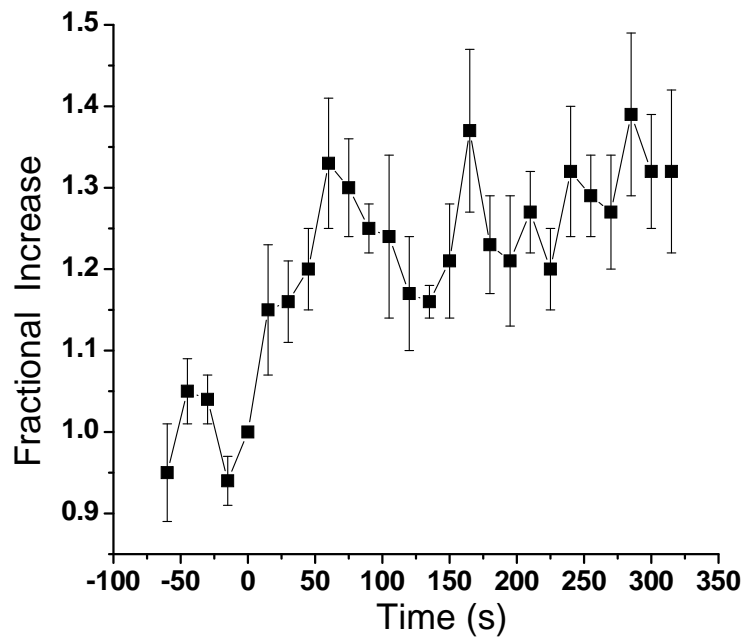

Figure 2 Supplemental - Time course of LH action on T-type calcium currents. Peak currents measured in response to -20 mV depolarizing pulses applied every 15 seconds from a holding potential of -80 mV and normalized to the value obtained immediately before superfusing the cell with external solution containing 1  $\mu\text{g/ml}$  of LH. Values are expressed as average of the fractional increase in current  $\pm$  se,  $n = 8$  cells. The average value of the currents before LH application was taken as 1 (time 0) and all other values referenced to it.
